# Supplementary material for: Brevinin-2GHk from Sylvirana guentheri and the Design of Truncated Analogs Exhibiting the Enhancement of Antimicrobial Activity
Source: PubMed Central journal article supplement (PMC7168151; doi:10.3390/antibiotics9020085), 2020-02-14
Supplement: antibiotics-09-00085-s001.pdf [file antibiotics-09-00085-s001.pdf]

1 **Supplementary Materials**

2

```
      M F T A K K S L L L L F F L G T I  
1  ATGTTACCG CGAAGAAATC CCTGTTACTC CTTTCTTTC TTGGGACCAT  
      S L S L C E E E R G A G E D D G  
51 CTCTTTATCT CTCTGTGAGG AAGAGAGAGG TGCAGGTGAA GATGATGGAA  
      T E E V K R G F S S L F K A G A K  
101 CGGAAGAAGT GAAAAGAGGT TTTTCCTCCT TGTTTAAAGC TGGAGCCAAG  
      Y L L K O V G K A G A O O L A C  
151 TATTTGCTCA AGCAAGTAGG CAAGGCAGGG GCACAGCAAT TGGCTTGTA  
      K A A N N C *  
201 AGCTGCCAAT AATTGTTAAA ACATAAATG GAAATCATCT GATGTGTACT  
251 ATCATTTAGC CAAGTGCTAA AAGTCTAATA AAAAAAGCAAT GTCACATAAA  
301 AAAAAAAAAA
```

3

4

5

6

7

**Figure S1.** The nucleotides and translated open-reading frame (ORF) amino acids sequences of Brevinin-2GHk precursor discovered from the skin secretion of *Sylvirana guentheri*. The putative signal peptide domain and the mature peptide domain are single-underlined and double-underlined, respectively. The stop is indicated by the asterisk.

8

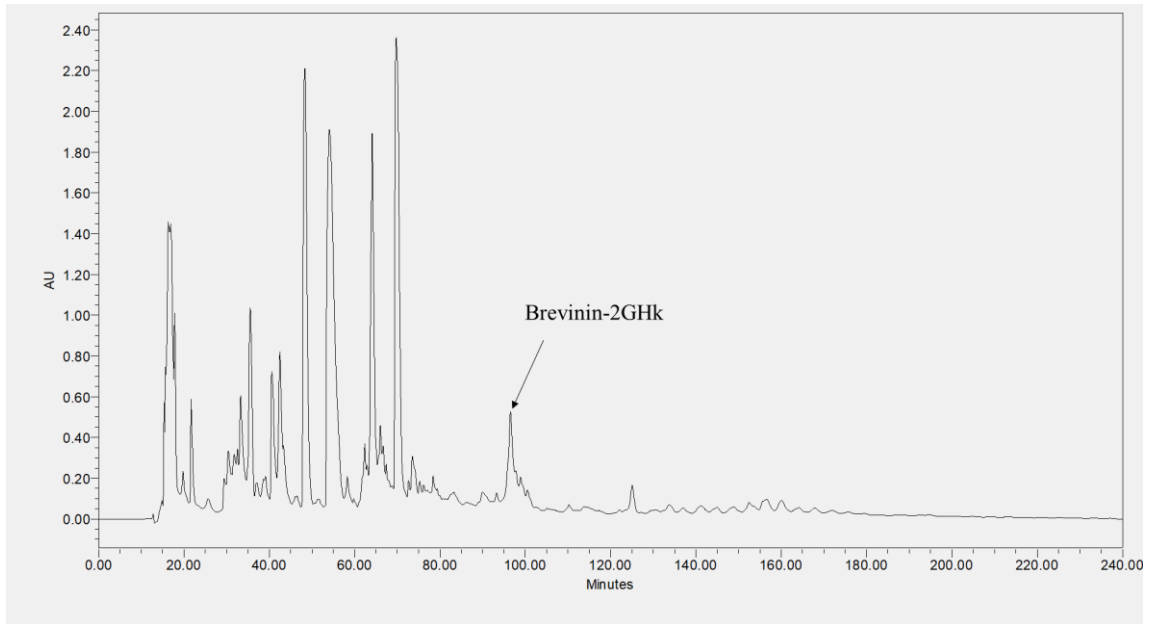

9

10

(a)

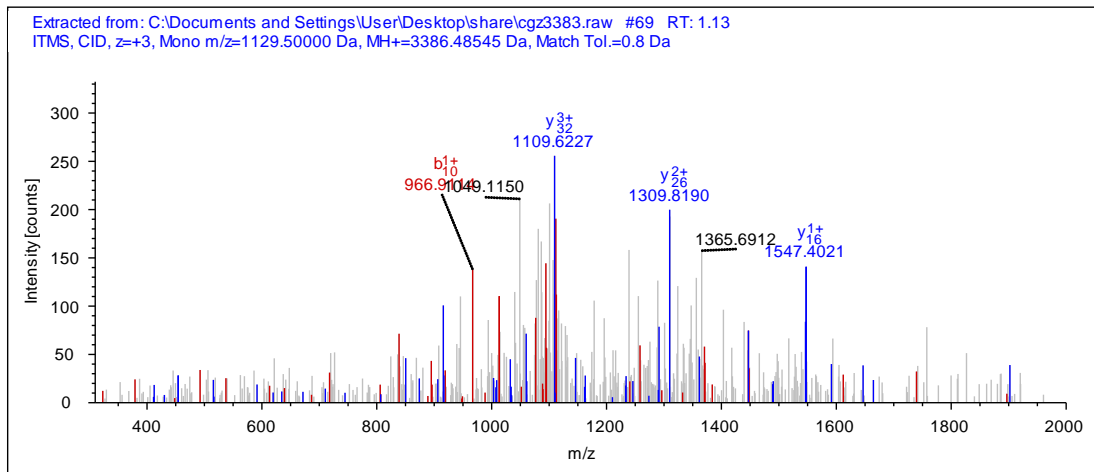

11

12

(b)

| #1 | b(1+)      | b(2+)      | b(3+)      | Seq. | y(1+)      | y(2+)      | y(3+)      | #2 |
|----|------------|------------|------------|------|------------|------------|------------|----|
| 1  | 58.02875   | 29.51801   | 20.01443   | G    |            |            |            | 33 |
| 2  | 205.09717  | 103.05222  | 69.03724   | F    | 3327.78183 | 1664.39455 | 1109.93213 | 32 |
| 3  | 292.12920  | 146.56824  | 98.04792   | S    | 3180.71341 | 1590.86034 | 1060.90932 | 31 |
| 4  | 379.16123  | 190.08425  | 127.05859  | S    | 3093.68138 | 1547.34433 | 1031.89864 | 30 |
| 5  | 492.24530  | 246.62629  | 164.75328  | L    | 3006.64935 | 1503.82831 | 1002.88797 | 29 |
| 6  | 639.31372  | 320.16050  | 213.77609  | F    | 2893.56528 | 1447.28628 | 965.19328  | 28 |
| 7  | 767.40869  | 384.20798  | 256.47441  | K    | 2746.49686 | 1373.75207 | 916.17047  | 27 |
| 8  | 838.44581  | 419.72654  | 280.15345  | A    | 2618.40189 | 1309.70458 | 873.47215  | 26 |
| 9  | 895.46728  | 448.23728  | 299.16061  | G    | 2547.36477 | 1274.18602 | 849.79311  | 25 |
| 10 | 966.50440  | 483.75584  | 322.83965  | A    | 2490.34330 | 1245.67529 | 830.78595  | 24 |
| 11 | 1094.59937 | 547.80332  | 365.53797  | K    | 2419.30618 | 1210.15673 | 807.10691  | 23 |
| 12 | 1257.66269 | 629.33498  | 419.89241  | Y    | 2291.21121 | 1146.10924 | 764.40859  | 22 |
| 13 | 1370.74676 | 685.87702  | 457.58710  | L    | 2128.14789 | 1064.57758 | 710.05415  | 21 |
| 14 | 1483.83083 | 742.41905  | 495.28179  | L    | 2015.06382 | 1008.03555 | 672.35946  | 20 |
| 15 | 1611.92580 | 806.46654  | 537.98012  | K    | 1901.97975 | 951.49351  | 634.66477  | 19 |
| 16 | 1739.98438 | 870.49583  | 580.66631  | Q    | 1773.88478 | 887.44603  | 591.96644  | 18 |
| 17 | 1839.05280 | 920.03004  | 613.68912  | V    | 1645.82620 | 823.41674  | 549.28025  | 17 |
| 18 | 1896.07427 | 948.54077  | 632.69627  | G    | 1546.75778 | 773.88253  | 516.25744  | 16 |
| 19 | 2024.16924 | 1012.58826 | 675.39460  | K    | 1489.73631 | 745.37179  | 497.25029  | 15 |
| 20 | 2095.20636 | 1048.10682 | 699.07364  | A    | 1361.64134 | 681.32431  | 454.55196  | 14 |
| 21 | 2152.22783 | 1076.61755 | 718.08079  | G    | 1290.60422 | 645.80575  | 430.87292  | 13 |
| 22 | 2223.26495 | 1112.13611 | 741.75983  | A    | 1233.58275 | 617.29501  | 411.86577  | 12 |
| 23 | 2351.32353 | 1176.16540 | 784.44603  | Q    | 1162.54563 | 581.77645  | 388.18673  | 11 |
| 24 | 2479.38211 | 1240.19469 | 827.13222  | Q    | 1034.48705 | 517.74716  | 345.50053  | 10 |
| 25 | 2592.46618 | 1296.73673 | 864.82691  | L    | 906.42847  | 453.71787  | 302.81434  | 9  |
| 26 | 2663.50330 | 1332.25529 | 888.50595  | A    | 793.34440  | 397.17584  | 265.11965  | 8  |
| 27 | 2766.51249 | 1383.75988 | 922.84235  | C    | 722.30728  | 361.65728  | 241.44061  | 7  |
| 28 | 2894.60746 | 1447.80737 | 965.54067  | K    | 619.29809  | 310.15268  | 207.10421  | 6  |
| 29 | 2965.64458 | 1483.32593 | 989.21971  | A    | 491.20312  | 246.10520  | 164.40589  | 5  |
| 30 | 3036.68170 | 1518.84449 | 1012.89875 | A    | 420.16600  | 210.58664  | 140.72685  | 4  |
| 31 | 3150.72463 | 1575.86595 | 1050.91306 | N    | 349.12888  | 175.06808  | 117.04781  | 3  |
| 32 | 3264.76756 | 1632.88742 | 1088.92737 | N    | 235.08595  | 118.04661  | 79.03350   | 2  |
| 33 |            |            |            | C    | 121.04302  | 61.02515   | 41.01919   | 1  |

13

14

(c)

15

16

17

18

19

**Figure S2.** Identification of brevinin-2GHk from the skin secretion of *Sylvirana guentheri*. (a) The RP-HPLC chromatogram of the skin secretion of *Sylvirana guentheri*. The arrow indicates the elution time of brevinin-2GHk. (b) The tandem mass spectrum of the fraction was analysed by MS/MS analysis. (c) The CID generated b and y ions from the MS/MS spectrum were observed as red and blue, respectively.

20

21

22

23  
24

**Table S1.** The summary of statistical analysis of the plasma membrane permeabilization of BR2GK and the truncated analogues against *S. aureus*.

| Tukey's multiple comparisons test                                 | Summary | Adjusted P Value |
|-------------------------------------------------------------------|---------|------------------|
| BR2GK vs. BR2GK(1-25)a                                            | ****    | <0.0001          |
| BR2GK vs. [A <sup>14</sup> ]BR2GK(1-25)a                          | **      | 0.0025           |
| BR2GK vs. [P <sup>14</sup> ]BR2GK(1-25)a                          | ****    | <0.0001          |
| BR2GK vs. [K <sup>14</sup> ]BR2GK(1-25)a                          | ****    | <0.0001          |
| BR2GK vs. [R <sup>14</sup> ]BR2GK(1-25)a                          | **      | 0.0042           |
| BR2GK vs. <b>Melittin</b>                                         | ****    | <0.0001          |
| BR2GK(1-25)a vs. [A <sup>14</sup> ]BR2GK(1-25)a                   | ****    | <0.0001          |
| BR2GK(1-25)a vs. [P <sup>14</sup> ]BR2GK(1-25)a                   | ****    | <0.0001          |
| BR2GK(1-25)a vs. [K <sup>14</sup> ]BR2GK(1-25)a                   | ****    | <0.0001          |
| BR2GK(1-25)a vs. [R <sup>14</sup> ]BR2GK(1-25)a                   | ****    | <0.0001          |
| BR2GK(1-25)a vs. <b>Melittin</b>                                  | ns      | >0.9999          |
| [A <sup>14</sup> ]BR2GK(1-25)a vs. [P <sup>14</sup> ]BR2GK(1-25)a | ****    | <0.0001          |
| [A <sup>14</sup> ]BR2GK(1-25)a vs. [K <sup>14</sup> ]BR2GK(1-25)a | ns      | 0.4723           |
| [A <sup>14</sup> ]BR2GK(1-25)a vs. [R <sup>14</sup> ]BR2GK(1-25)a | ns      | >0.9999          |
| [A <sup>14</sup> ]BR2GK(1-25)a vs. <b>Melittin</b>                | ****    | <0.0001          |
| [P <sup>14</sup> ]BR2GK(1-25)a vs. [K <sup>14</sup> ]BR2GK(1-25)a | ****    | <0.0001          |
| [P <sup>14</sup> ]BR2GK(1-25)a vs. [R <sup>14</sup> ]BR2GK(1-25)a | ****    | <0.0001          |
| [P <sup>14</sup> ]BR2GK(1-25)a vs. <b>Melittin</b>                | ****    | <0.0001          |
| [K <sup>14</sup> ]BR2GK(1-25)a vs. [R <sup>14</sup> ]BR2GK(1-25)a | ns      | 0.3559           |
| [K <sup>14</sup> ]BR2GK(1-25)a vs. <b>Melittin</b>                | ****    | <0.0001          |
| [R <sup>14</sup> ]BR2GK(1-25)a vs. <b>Melittin</b>                | ****    | <0.0001          |

25  
26

27  
28

**Table S2.** The summary of statistical analysis of the outer membrane permeabilization of BR2GK and the truncated analogues against *P. aeruginosa*.

| Tukey's multiple comparisons test               | Summary | Adjusted P Value |
|-------------------------------------------------|---------|------------------|
| BR2GK vs. BR2GK(1-25)a                          | ***     | 0.0007           |
| BR2GK vs. [A <sup>14</sup> ]BR2GK(1-25)a        | *       | 0.0299           |
| BR2GK vs. [P <sup>14</sup> ]BR2GK(1-25)a        | ****    | <0.0001          |
| BR2GK vs. [K <sup>14</sup> ]BR2GK(1-25)a        | *       | 0.0485           |
| BR2GK vs. [R <sup>14</sup> ]BR2GK(1-25)a        | ns      | 0.9785           |
| BR2GK vs. <b>Melittin</b>                       | ***     | 0.0001           |
| BR2GK(1-25)a vs. [A <sup>14</sup> ]BR2GK(1-25)a | ns      | 0.7609           |
| BR2GK(1-25)a vs. [P <sup>14</sup> ]BR2GK(1-25)a | ****    | <0.0001          |
| BR2GK(1-25)a vs. [K <sup>14</sup> ]BR2GK(1-25)a | ****    | <0.0001          |
| BR2GK(1-25)a vs. [R <sup>14</sup> ]BR2GK(1-25)a | ****    | <0.0001          |

|                                                                   |      |         |
|-------------------------------------------------------------------|------|---------|
| BR2GK(1-25)a vs. Melittin                                         | ns   | 0.9932  |
| [A <sup>14</sup> ]BR2GK(1-25)a vs. [P <sup>14</sup> ]BR2GK(1-25)a | **** | <0.0001 |
| [A <sup>14</sup> ]BR2GK(1-25)a vs. [K <sup>14</sup> ]BR2GK(1-25)a | **** | <0.0001 |
| [A <sup>14</sup> ]BR2GK(1-25)a vs. [R <sup>14</sup> ]BR2GK(1-25)a | **   | 0.0037  |
| [A <sup>14</sup> ]BR2GK(1-25)a vs. Melittin                       | ns   | 0.3593  |
| [P <sup>14</sup> ]BR2GK(1-25)a vs. [K <sup>14</sup> ]BR2GK(1-25)a | **** | <0.0001 |
| [P <sup>14</sup> ]BR2GK(1-25)a vs. [R <sup>14</sup> ]BR2GK(1-25)a | **** | <0.0001 |
| [P <sup>14</sup> ]BR2GK(1-25)a vs. Melittin                       | **** | <0.0001 |
| [K <sup>14</sup> ]BR2GK(1-25)a vs. [R <sup>14</sup> ]BR2GK(1-25)a | ns   | 0.2578  |
| [K <sup>14</sup> ]BR2GK(1-25)a vs. Melittin                       | **** | <0.0001 |
| [R <sup>14</sup> ]BR2GK(1-25)a vs. Melittin                       | **** | <0.0001 |

29

30

31

**Table S3.** The summary of statistical analysis of cytotoxicity of BR2GK and the truncated analogues against HEMC-1 cells at 100  $\mu$ M.

| Tukey's multiple comparisons test                                 | Summary | Adjusted P Value |
|-------------------------------------------------------------------|---------|------------------|
| 100 $\mu$ M                                                       |         |                  |
| BR2GK vs. BR2GK(1-25)a                                            | ****    | <0.0001          |
| BR2GK vs. [A <sup>14</sup> ]BR2GK(1-25)a                          | ****    | <0.0001          |
| BR2GK vs. [P <sup>14</sup> ]BR2GK(1-25)a                          | ****    | <0.0001          |
| BR2GK vs. [K <sup>14</sup> ]BR2GK(1-25)a                          | ****    | <0.0001          |
| BR2GK vs. [R <sup>14</sup> ]BR2GK(1-25)a                          | ****    | <0.0001          |
| BR2GK(1-25)a vs. [A <sup>14</sup> ]BR2GK(1-25)a                   | ****    | <0.0001          |
| BR2GK(1-25)a vs. [P <sup>14</sup> ]BR2GK(1-25)a                   | ****    | <0.0001          |
| BR2GK(1-25)a vs. [K <sup>14</sup> ]BR2GK(1-25)a                   | ns      | 0.1111           |
| BR2GK(1-25)a vs. [R <sup>14</sup> ]BR2GK(1-25)a                   | ns      | 0.8692           |
| [A <sup>14</sup> ]BR2GK(1-25)a vs. [P <sup>14</sup> ]BR2GK(1-25)a | ns      | 0.9311           |
| [A <sup>14</sup> ]BR2GK(1-25)a vs. [K <sup>14</sup> ]BR2GK(1-25)a | ns      | 0.1346           |
| [A <sup>14</sup> ]BR2GK(1-25)a vs. [R <sup>14</sup> ]BR2GK(1-25)a | **      | 0.0022           |
| [P <sup>14</sup> ]BR2GK(1-25)a vs. [K <sup>14</sup> ]BR2GK(1-25)a | *       | 0.0112           |
| [P <sup>14</sup> ]BR2GK(1-25)a vs. [R <sup>14</sup> ]BR2GK(1-25)a | ****    | <0.0001          |
| [K <sup>14</sup> ]BR2GK(1-25)a vs. [R <sup>14</sup> ]BR2GK(1-25)a | ns      | 0.6830           |

32

33

34

**Table S4.** The summary of statistical analysis of haemolysis of BR2GK and the truncated analogues against horse erythrocytes at 256, 128, 64 and 32  $\mu$ M.

| Tukey's multiple comparisons test | Summary | Adjusted P Value |
|-----------------------------------|---------|------------------|
|                                   |         |                  |

|                                         |      |         |
|-----------------------------------------|------|---------|
| 256 $\mu$ M                             |      |         |
| BR2GK vs. BR2GK(1-25)a                  | **** | <0.0001 |
| BR2GK vs. [A14]BR2GK(1-25)a             | **** | <0.0001 |
| BR2GK vs. [P14]BR2GK(1-25)a             | **** | <0.0001 |
| BR2GK vs. [K14]BR2GK(1-25)a             | **** | <0.0001 |
| BR2GK vs. [R14]BR2GK(1-25)a             | **** | <0.0001 |
| BR2GK(1-25)a vs. [A14]BR2GK(1-25)a      | **** | <0.0001 |
| BR2GK(1-25)a vs. [P14]BR2GK(1-25)a      | **** | <0.0001 |
| BR2GK(1-25)a vs. [K14]BR2GK(1-25)a      | **** | <0.0001 |
| BR2GK(1-25)a vs. [R14]BR2GK(1-25)a      | **** | <0.0001 |
| [A14]BR2GK(1-25)a vs. [P14]BR2GK(1-25)a | ns   | 0.1859  |
| [A14]BR2GK(1-25)a vs. [K14]BR2GK(1-25)a | ns   | 0.6257  |
| [A14]BR2GK(1-25)a vs. [R14]BR2GK(1-25)a | ns   | 0.9988  |
| [P14]BR2GK(1-25)a vs. [K14]BR2GK(1-25)a | **   | 0.0021  |
| [P14]BR2GK(1-25)a vs. [R14]BR2GK(1-25)a | ns   | 0.0765  |
| [K14]BR2GK(1-25)a vs. [R14]BR2GK(1-25)a | ns   | 0.8499  |
|                                         |      |         |
| 128 $\mu$ M                             |      |         |
| BR2GK vs. BR2GK(1-25)a                  | **** | <0.0001 |
| BR2GK vs. [A14]BR2GK(1-25)a             | **** | <0.0001 |
| BR2GK vs. [P14]BR2GK(1-25)a             | **** | <0.0001 |
| BR2GK vs. [K14]BR2GK(1-25)a             | **** | <0.0001 |
| BR2GK vs. [R14]BR2GK(1-25)a             | **** | <0.0001 |
| BR2GK(1-25)a vs. [A14]BR2GK(1-25)a      | **** | <0.0001 |
| BR2GK(1-25)a vs. [P14]BR2GK(1-25)a      | **** | <0.0001 |
| BR2GK(1-25)a vs. [K14]BR2GK(1-25)a      | **** | <0.0001 |
| BR2GK(1-25)a vs. [R14]BR2GK(1-25)a      | **** | <0.0001 |
| [A14]BR2GK(1-25)a vs. [P14]BR2GK(1-25)a | ns   | 0.3766  |
| [A14]BR2GK(1-25)a vs. [K14]BR2GK(1-25)a | ns   | 0.1859  |
| [A14]BR2GK(1-25)a vs. [R14]BR2GK(1-25)a | ns   | 0.3766  |
| [P14]BR2GK(1-25)a vs. [K14]BR2GK(1-25)a | ***  | 0.0005  |
| [P14]BR2GK(1-25)a vs. [R14]BR2GK(1-25)a | **   | 0.0021  |
| [K14]BR2GK(1-25)a vs. [R14]BR2GK(1-25)a | ns   | 0.9988  |
|                                         |      |         |
| 64 $\mu$ M                              |      |         |
| BR2GK vs. BR2GK(1-25)a                  | **** | <0.0001 |
| BR2GK vs. [A14]BR2GK(1-25)a             | **** | <0.0001 |
| BR2GK vs. [P14]BR2GK(1-25)a             | **** | <0.0001 |
| BR2GK vs. [K14]BR2GK(1-25)a             | **** | <0.0001 |

|                                         |      |         |
|-----------------------------------------|------|---------|
| BR2GK vs. [R14]BR2GK(1-25)a             | **** | <0.0001 |
| BR2GK(1-25)a vs. [A14]BR2GK(1-25)a      | **** | <0.0001 |
| BR2GK(1-25)a vs. [P14]BR2GK(1-25)a      | **** | <0.0001 |
| BR2GK(1-25)a vs. [K14]BR2GK(1-25)a      | **** | <0.0001 |
| BR2GK(1-25)a vs. [R14]BR2GK(1-25)a      | ***  | 0.0005  |
| [A14]BR2GK(1-25)a vs. [P14]BR2GK(1-25)a | ns   | 0.8499  |
| [A14]BR2GK(1-25)a vs. [K14]BR2GK(1-25)a | ns   | 0.8499  |
| [A14]BR2GK(1-25)a vs. [R14]BR2GK(1-25)a | ns   | 0.3766  |
| [P14]BR2GK(1-25)a vs. [K14]BR2GK(1-25)a | ns   | 0.1859  |
| [P14]BR2GK(1-25)a vs. [R14]BR2GK(1-25)a | *    | 0.0267  |
| [K14]BR2GK(1-25)a vs. [R14]BR2GK(1-25)a | ns   | 0.9703  |
|                                         |      |         |
| 32 $\mu$ M                              |      |         |
| BR2GK vs. BR2GK(1-25)a                  | ns   | 0.3766  |
| BR2GK vs. [A14]BR2GK(1-25)a             | **** | <0.0001 |
| BR2GK vs. [P14]BR2GK(1-25)a             | **** | <0.0001 |
| BR2GK vs. [K14]BR2GK(1-25)a             | **** | <0.0001 |
| BR2GK vs. [R14]BR2GK(1-25)a             | **** | <0.0001 |
| BR2GK(1-25)a vs. [A14]BR2GK(1-25)a      | ***  | 0.0005  |
| BR2GK(1-25)a vs. [P14]BR2GK(1-25)a      | **** | <0.0001 |
| BR2GK(1-25)a vs. [K14]BR2GK(1-25)a      | *    | 0.0267  |
| BR2GK(1-25)a vs. [R14]BR2GK(1-25)a      | *    | 0.0267  |
| [A14]BR2GK(1-25)a vs. [P14]BR2GK(1-25)a | ns   | 0.8499  |
| [A14]BR2GK(1-25)a vs. [K14]BR2GK(1-25)a | ns   | 0.8499  |
| [A14]BR2GK(1-25)a vs. [R14]BR2GK(1-25)a | ns   | 0.8499  |
| [P14]BR2GK(1-25)a vs. [K14]BR2GK(1-25)a | ns   | 0.1859  |
| [P14]BR2GK(1-25)a vs. [R14]BR2GK(1-25)a | ns   | 0.1859  |
| [K14]BR2GK(1-25)a vs. [R14]BR2GK(1-25)a | ns   | >0.9999 |
|                                         |      |         |
